# Supplementary material for: Cu2+1O/graphene nanosheets supported on three dimensional copper foam for sensitive and efficient non-enzymatic detection of glucose
Source: Royal Society of Chemistry journal article supplement (doi:10.1039/c7ra02011b), 2017-01-01
Supplement: c7ra02011b1.pdf [file c7ra02011b1.pdf]

## Electronic Supplementary Information (ESI)

### **Cu<sub>2</sub>O/graphene nanosheets supported on three dimensional copper foam for sensitive and efficient non-enzymatic detection of glucose**

Liang Yang, Daoping Liu, Guomin Cui\*, Yingming Xie

*Institute of New Energy Science and Engineering, School of Energy and Power  
Engineering, University of Shanghai for Science and Technology, Shanghai 200093,  
China*

*\* Corresponding author. Tel/Fax: +86 21 55272320. E-mail address:*

*cgm1226@163.com (G.M. Cui).*

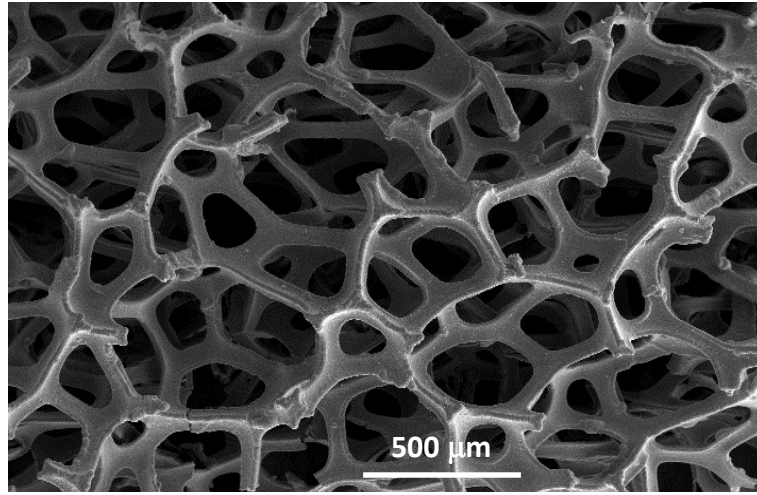

Fig. S1 SEM images of CF

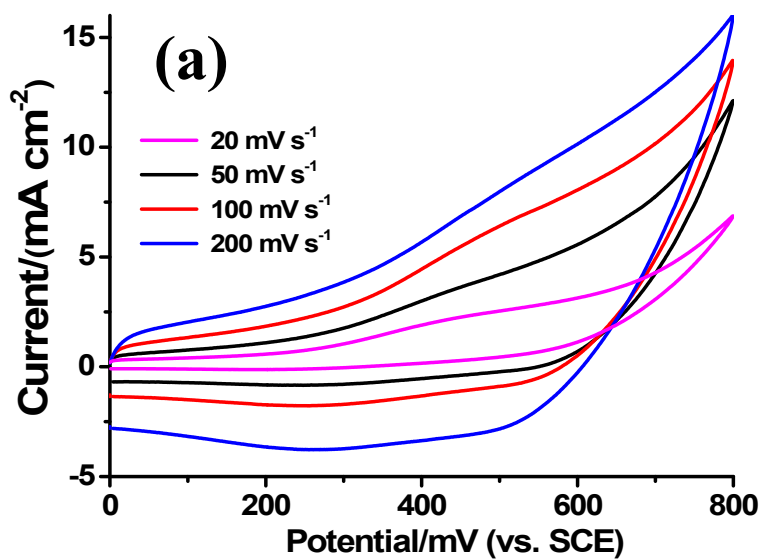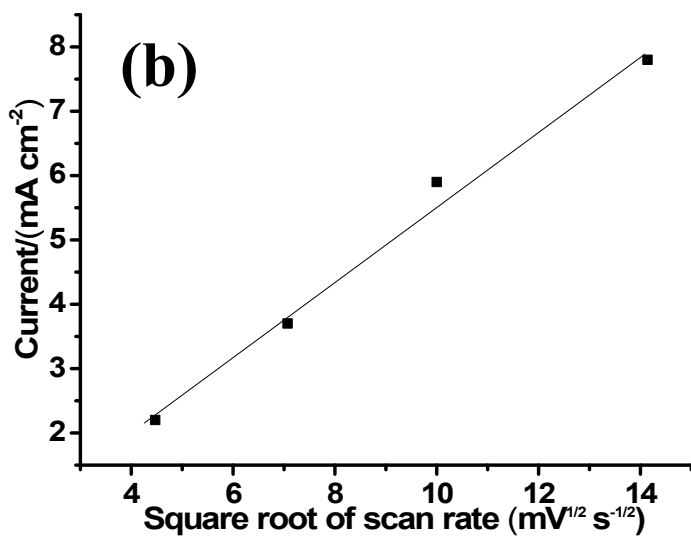

Fig. S2 (a) Cyclic voltammograms of GN/Cu<sub>2+1</sub>O/CF electrode with addition of 5mM glucose in 0.1 M NaOH at various scan rates from 20, 50, 100, and 200 mV s<sup>-1</sup>, respectively. (b) plot of peak current vs. square root of scan rate.

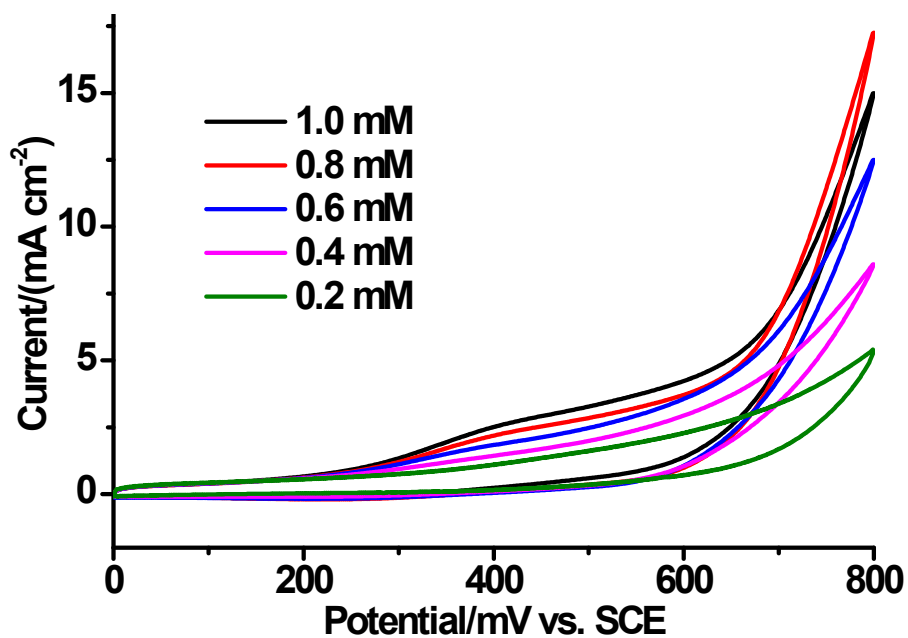

Fig. S3 Cyclic voltammograms of GN/Cu<sub>2+1</sub>O/CF electrode with different concentrations of glucose in 0.1 M NaOH. Scan rate is 20 mV S<sup>-1</sup>.

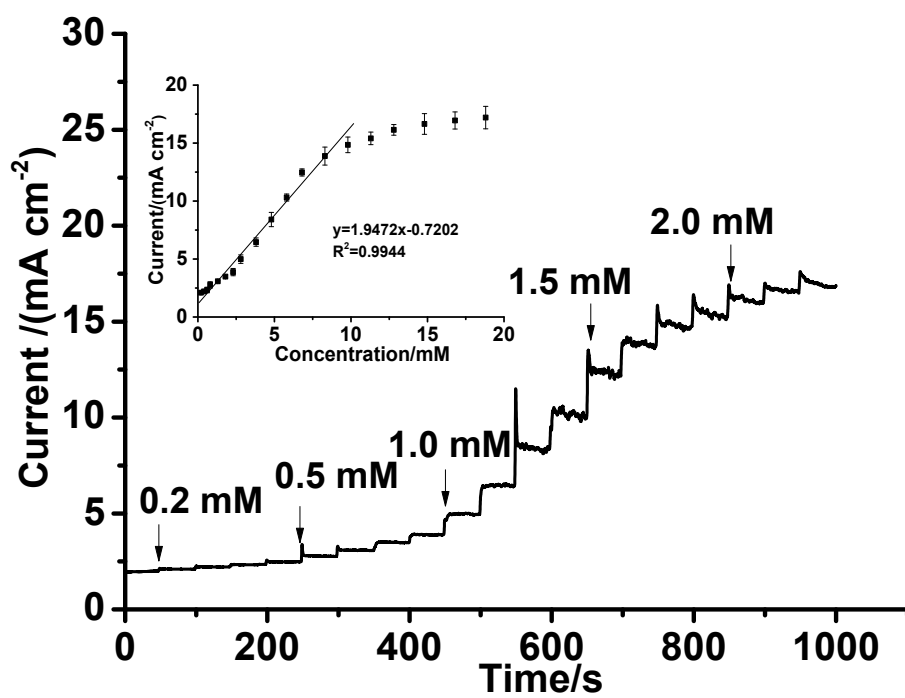

Fig. S4 Amperometric responses of  $\text{Cu}_{2+1}\text{O}/\text{CF}$  and electrode upon successive addition of glucose in 0.1 M KOH at 450 mV (vs. SCE). And inset is the corresponding calibration curves.

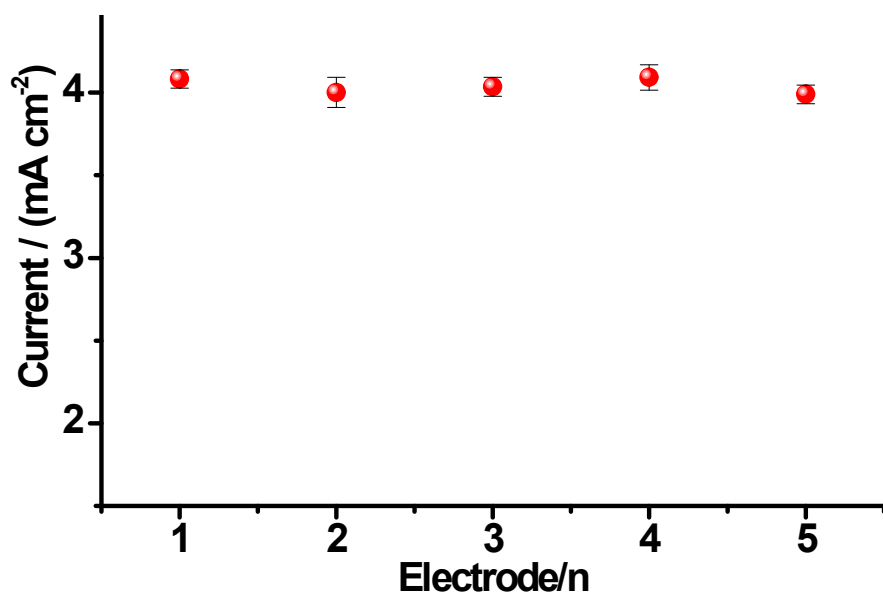

Fig. S5 Reproducibility of five GN/Cu<sub>2+1</sub>O/CF electrodes for detection of 1.0 mM glucose.

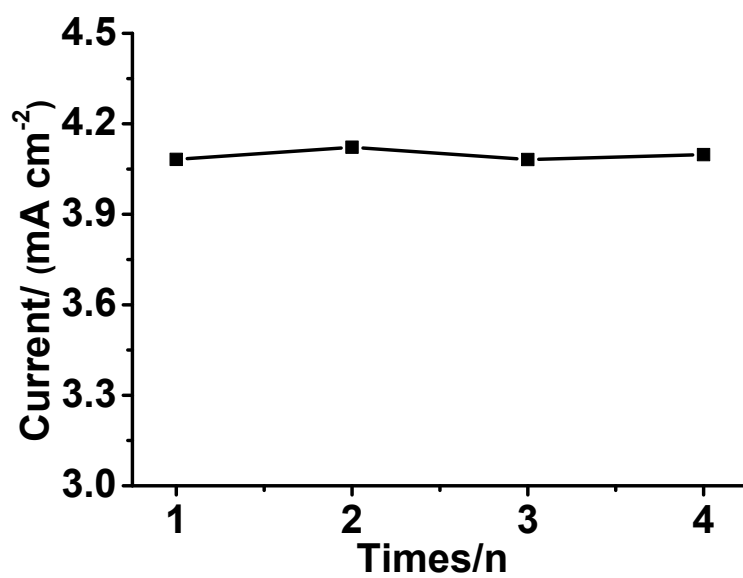

Fig. S6 The repeatability of GN/Cu<sub>2+1</sub>O/CF electrode for detecting 1.0 mM glucose for four times.

**Table S1** Comparison of the performance of electrode with previously reported non-enzymatic glucose sensors.

| <b>Samples</b>                      | <b>Sensitivity<br/>(<math>\mu\text{A}\cdot\text{mM}^{-1}\cdot\text{cm}^{-2}</math>)</b> | <b>Detection<br/>limit (<math>\mu\text{M}</math>)</b> | <b>Applied potential<br/>(V)</b> | <b>Ref.</b> |
|-------------------------------------|-----------------------------------------------------------------------------------------|-------------------------------------------------------|----------------------------------|-------------|
| GN/Cu <sub>2+1</sub> O/CF           | 3076                                                                                    | 5.0                                                   | 0.45 V vs. SCE                   | This work   |
| Copper foam                         | 2570                                                                                    | 0.98                                                  | 0.50 V vs. Ag/AgCl               | 1           |
| Copper foam                         | 1810                                                                                    | 0.98                                                  | 0.50 V vs. Ag/AgCl               | 1           |
| hollow CuO<br>polyhedron            | 1112                                                                                    | 0.33                                                  | 0.50 V vs. Ag/AgCl               | 2           |
| CuO/SG                              | 1298                                                                                    | 0.08                                                  | 0.50 V vs. Ag/AgCl               | 3           |
| Cu foam                             | 3397                                                                                    | 12.96                                                 | 0.50V vs. Ag/AgCl                | 4           |
| CuO nanoellipsoids                  | 2555                                                                                    | 0.072                                                 | 0.55 V vs. Ag/AgCl               | 5           |
| CuO NT arrays                       | 1890                                                                                    | 0.1                                                   | 0.32 V vs. Ag/AgCl               | 6           |
| CuO nanowires/<br>copper<br>foam    | 2217                                                                                    | 0.3                                                   | 0.35 V vs. Ag/AgCl               | 7           |
| CuO<br>nanotubes/copper foil        | 1890                                                                                    | 0.1                                                   | 0.32 V vs. Ag/AgCl               | 8           |
| CuO nanourchins                     | 2682                                                                                    | 1.52                                                  | 0.50 V vs. Ag/AgCl               | 9           |
| inkjet printed CuO<br>nanoparticles | 2762.5                                                                                  | 0.5                                                   | 0.60 V vs. Ag/AgCl               | 10          |
| CuO nanospheres                     | 404.53                                                                                  | 1.0                                                   | 0.60 V vs. Ag/AgCl               | 11          |
| CuO nanoparticles                   | 1430                                                                                    | 5.0                                                   | 0.40 V vs. Ag/AgCl               | 12          |
| CuO nanowires                       | 648.2                                                                                   | 2.0                                                   | 0.55 V vs. Ag/AgCl               | 13          |
| Cu nanowires/Cu                     | 490                                                                                     | 0.049                                                 | 0.33 V vs. Ag/AgCl               | 14          |
| CuO nanofibers                      | 431.3                                                                                   | 0.8                                                   | 0.40 V vs. Ag/AgCl               | 15          |
| CuO nanoflowers                     | 2657                                                                                    | 1.71                                                  | 0.50 V vs. Ag/AgCl               | 16          |

## References

S1. X. H. Niu, M. B. Lan, H. L. Zhao, C. Chen, *Anal. Chem.*, 2013, 85, 3561-3569.



- S2. C. Kong, L. Tang, X. Zhang, S. Sun, S. Yang, X. Song, Z. Yang, J. Mater. Chem. A, 2014, 2, 7306-7312.
- S3. Y. Tian, Y. Liu, W. P. Wang, X. Zhang, W. Peng, Electrochim. Acta, 2015, 156, 244-251.
- S4. J. Jin, G. Zheng, Y. Ge, S. Deng, W. Liu, G. Hui, Electrochim. Acta, 2015, 153, 594-601.
- S5. X. Zhang, S. Sun, J. Lv, L. Tang, C. Kong, X. Song, Z. Yang, J. Mater. Chem. A, 2014, 2, 10073-10080.
- S6. L. Xu, Q. Yang, X. Liu, J. Liu, X. Sun, RSC Adv., 2014, 4, 1449-1455.
- S7. Z. Z. Li, Y. Chen, Y. M. Xin, Z. H. Zhang, Sci Rep., 2015, 5, 16115.
- S8. S. Yuan, X. L. Huang, D. L. Ma, H. G. Wang, F. Z. Meng, X. B. Zhang, Adv. Mater., 2014, 26, 2273–2279.
- S9. S.D. Sun, X.Z. Zhang, Y.X. Sun, S.C. Yang, X.P. Song, Z.M. Yang, ACS Appl. Mater. Interfaces, 2013, 5, 4429-4437.
- S10. R. Ahmad, M. Vaseem, N. Tripathy, Y.B. Hahn, Anal. Chem., 2013, 85, 10448–10454.
- S11. E. Reitz, W.Z. Jia, M. Gentile, Y. Wang, Y. Lei, Electroanalysis, 2008, 20, 2482-2486.

S12. F.Y. Huang, Y.M. Zhong, J. Chen, S.X. Li, Y.C. Li, F. Wang, S. Q. Feng, *Anal. Methods.*, 2013, 5, 3050-3055.

S13. X. Wang, C. G. Hu, H. Liu, G.J. Du, X.S. He, Y.Xi, *Sensor Actuat B: Chem*, 2010, 144, 220–225.

S14. Z. Zhuang, X. Su, H. Yuan, Q. Sun, D. Xiao, M.M. Choi, *Analyst*, 2008, 133, 126–132.

S15. W. Wang, L. Zhang, S. Tong, X.Li, W. Song, *Biosens. Bioelectron.*, 2009, 25, 708–714.

S16. S. Sun, X. Zhang, Y. Sun, S. Yang, X. Song, Z. Yang, *Phys. Chem. Chem. Phys.*, 2013, 15, 10904–10913.
